# Supplementary material for: Introducing Ti3+defects based on lattice distortion for enhanced visible light photoreactivity in TiO2microspheres
Source: Royal Society of Chemistry journal article supplement (doi:10.1039/c7ra04885h), 2017-01-01
Supplement: c7ra04885h1.pdf [file c7ra04885h1.pdf]

## Supporting Information

### **Introducing Ti<sup>3+</sup> Defects Based on Lattice Distortion for Enhanced Visible Light Photoreactivity in TiO<sub>2</sub> Microspheres**

Yunfan Xu <sup>a,b</sup> Sujuan Wu <sup>a\*</sup> Piaopiao Wan <sup>a</sup> and Jianguo Sun <sup>a</sup> and Zachary D. Hood <sup>c,d</sup>

---

<sup>a.</sup> Electron Microscopy Center of Chongqing University, College of Materials Science and Engineering, Chongqing University, Chongqing, China.

<sup>b.</sup> Laboratory of Advanced Materials, Department of Materials Science and Engineering, Tsinghua University, Beijing, China.

<sup>c.</sup> School of Chemistry and Biochemistry, Georgia Institute of Technology, Atlanta, Georgia 30332, United States

<sup>d.</sup> Center for Nanophase Materials Sciences, Oak Ridge National Laboratory, Oak Ridge, Tennessee 37831, United States

---

*Corresponding Author: Sujuan Wu*

*Email: [sujuan.wu@cqu.edu.cn](mailto:sujuan.wu@cqu.edu.cn)*

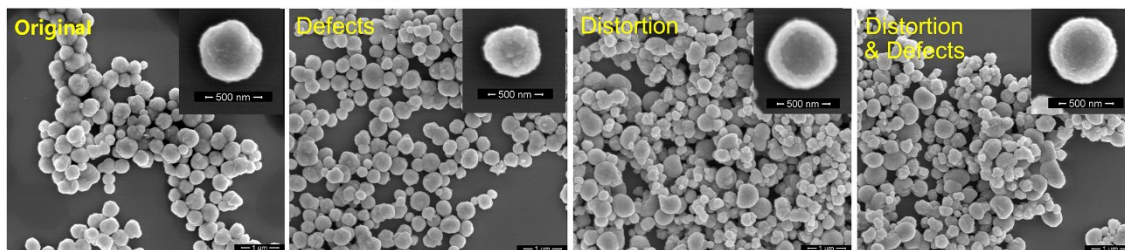

**Figure S1.** SEM images of as-prepared  $\text{TiO}_2$  samples. The morphology of as-prepared  $\text{TiO}_2$  samples greatly change when chloride ions are added.

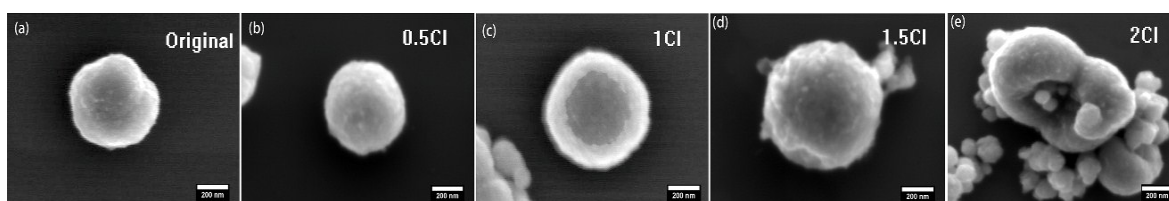

**Figure S2.** SEM images of as-prepared  $\text{TiO}_2$  samples of different chloride ion content (noted on the images). It can be inferred that the chloride ions acts as surface surfactant.

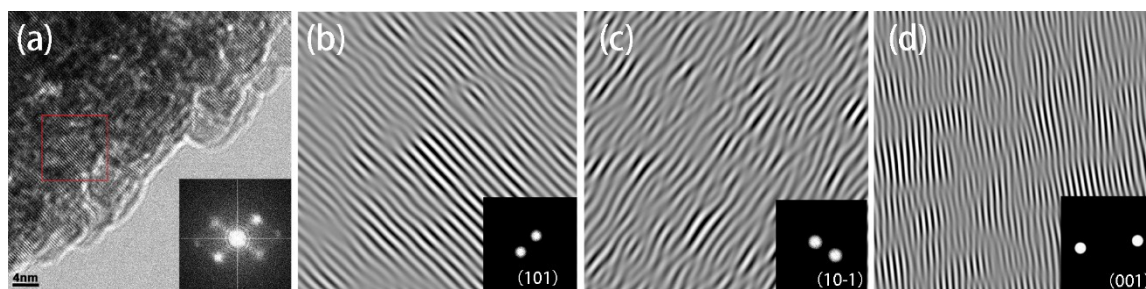

**Figure S3.** FFT of the lattice distorted  $\text{TiO}_2$  sample. Great lattice distortions can be observed.

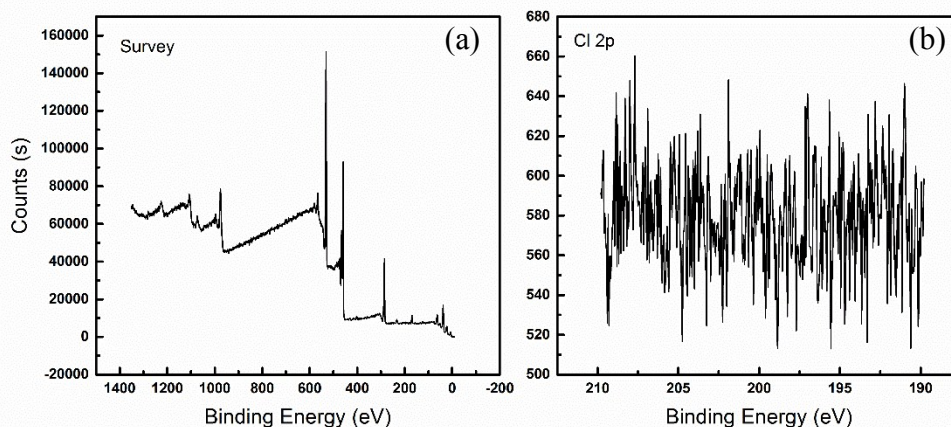

**Figure S4.** (a) XPS survey spectrum of lattice distorted  $\text{TiO}_2$ ; (b) Cl 2p XPS spectrum of  $\text{TiO}_2$  with lattice distortion.

No chlorine signal was present in the high resolution Cl 2p scan.

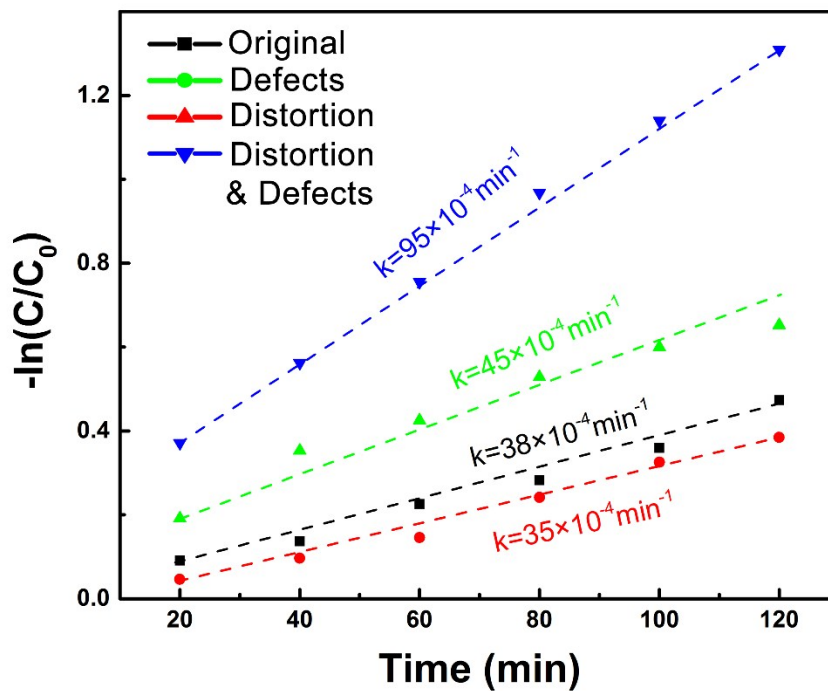

**Figure S5.** Kinetic fit for the degradation of RhB under visible light irradiation. The  $\text{TiO}_2$  hollow microspheres with both lattice distortion and  $\text{Ti}^{3+}$  defects achieved the highest degradation rate of RhB under visible light irradiation.

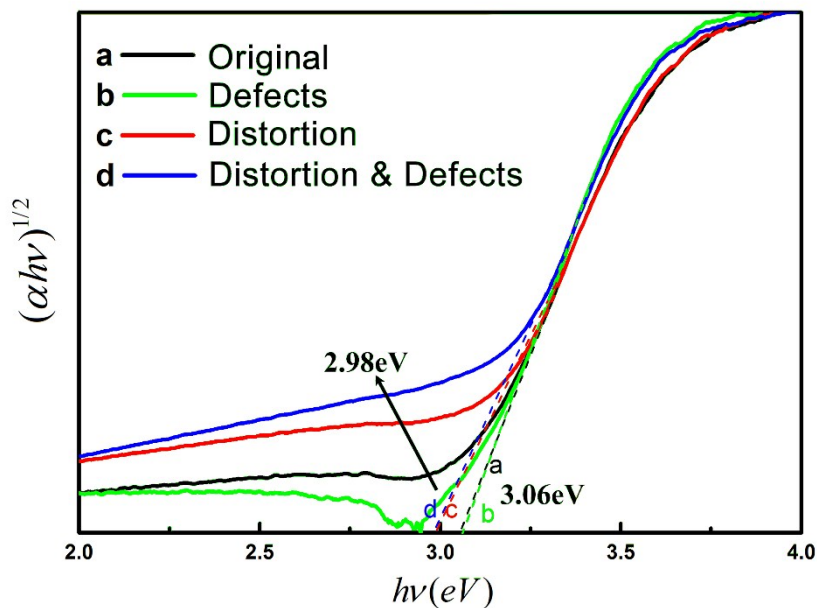

**Figure S6.**  $(\alpha E_{\text{photon}})^{1/2}$  vs  $E_{\text{photon}}$  curves of  $\text{TiO}_2$  microspheres. The band gap of Original, Defects, Distortion, and Distortion & Defects are 3.06 eV, 2.98 eV, 3.06 eV, and 2.98 eV, respectively.

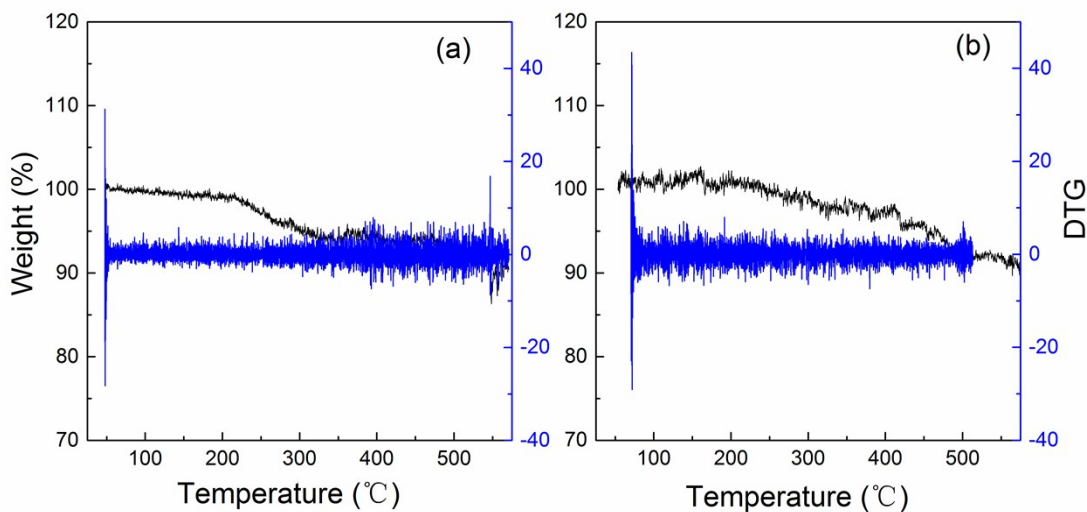

**Figure S7.** TG and DTG curves of (a) Defects and (b) Distortion & Defects. It can be seen from the TGA curves that no organic matter remains after EG reduction.

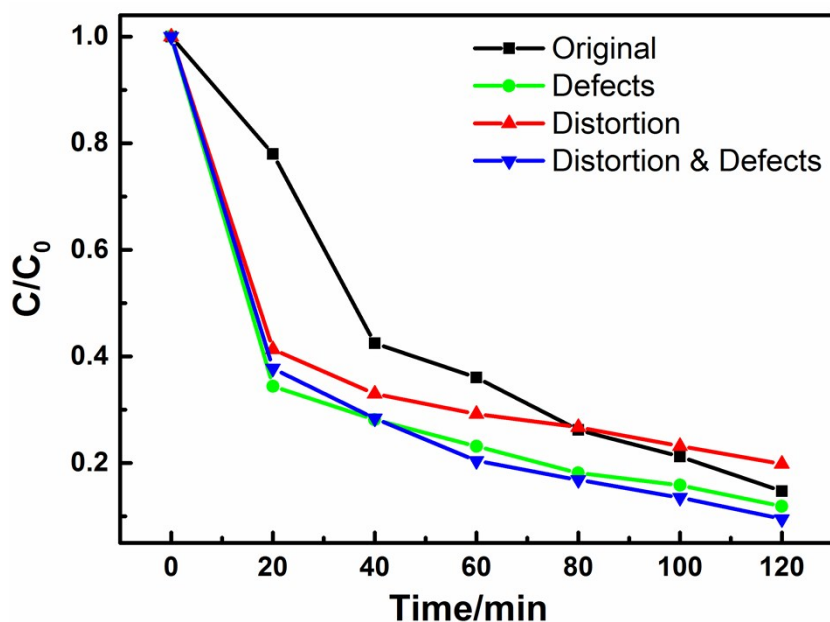

**Figure S8.** The degradation of phenol using the different TiO<sub>2</sub> samples under visible light irradiation. The degradation tendency of phenol is almost the same as the degradation of RhB; therefore, the dye sensitization was not found to be that significant.

**Table S1.** BET Surface area of as-prepared TiO<sub>2</sub> samples

| Sample                           | Original | Distortion | Defects | Distortion & Defects |
|----------------------------------|----------|------------|---------|----------------------|
| Surface area (m <sup>2</sup> /g) | 185      | 188        | 114     | 143                  |

### Theoretical Calculation

Density functional theory (DFT) calculations are carried out with a VASP package (the Vienna *ab initio* Simulation Package) using plane wave basis sets with a cutoff of 340 eV. The generalized gradient approximation with the function of Perdew-Burke-Ernzerhof (PBE) is utilized for all geometric optimization and energy calculation. A 2×2×1 supercell containing 24 Titanium atoms and 48 Oxygen atoms was employed, where a vacuum of 10 Å is used to simulate the surface in periodic boundary condition. The effect of chlorine is simulated by adding 4 Chlorine atoms above the (101) surface of TiO<sub>2</sub> within vacuum layer. The bond length change was calculated through geometry optimization and the energy change was calculated through energy calculations.

It was found that the length of the Ti-O bond increases from 1.780 Å to 1.802 Å with the existence of Cl atoms due to its higher electronegativity than O ion, resulting in the lattice expanding on the surface of TiO<sub>2</sub>. Surface oxygen ions in these distorted TiO<sub>2</sub> lattices are easier to be removed and oxygen vacancies are easier to be generated on the basis that less energy (~0.032 eV less) are required in lattice-distorted areas (6.08 eV) than in perfect lattice areas (6.11 eV).
